# Supplementary material for: Selective binding and highly sensitive fluorescent sensor of palmatine and dehydrocorydaline alkaloids by cucurbit[7]uril
Source: Royal Society of Chemistry journal article supplement (doi:10.1039/b820852b), 2009-01-01
Supplement: b820852b.pdf [file b820852b.pdf]

## **Electronic Supplementary Information for**

# Selective Binding and Highly Sensitive Fluorescent Sensor of Palmatine and Dehydrocorydaline Alkaloids by Cucurbit[7]uril

*Chunju Li\*, Jian Li and Xueshun Jia\**

Department of Chemistry, Shanghai University, 200444, Shanghai, P. R.China

\*To whom correspondence should be addressed.

E-mail: [cjli@shu.edu.cn](mailto:cjli@shu.edu.cn)

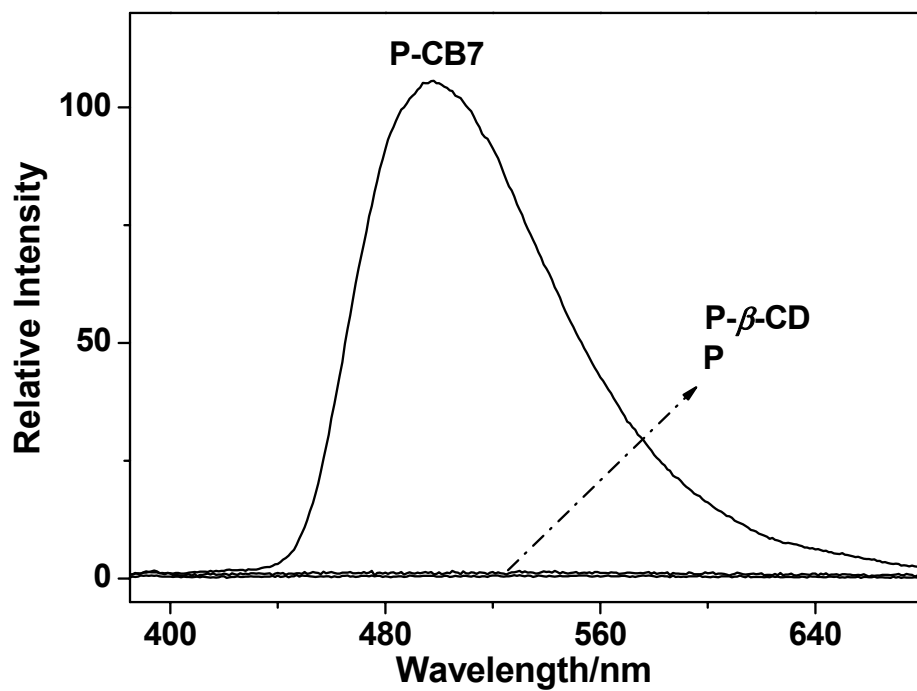

**Fig. S1** Fluorescence spectra of P in the presence and absence of CB7 or  $\beta$ -CD host in aqueous phosphate buffer solution (pH 7.2) at 298.15 K. The concentration of P is  $1.25 \times 10^{-5} \text{ mol dm}^{-3}$ .

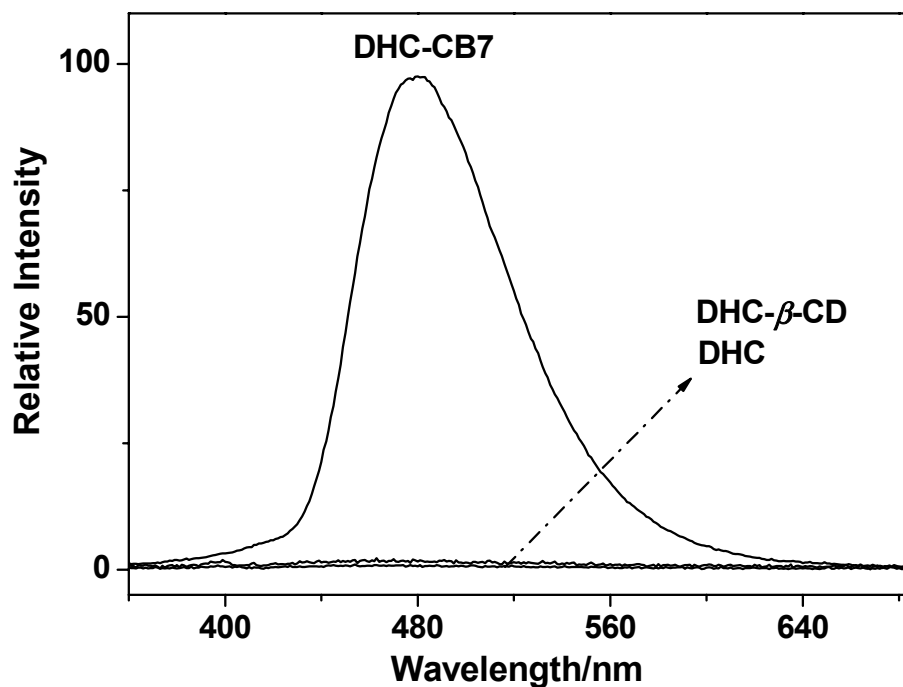

**Fig. S2** Fluorescence spectra of DHC in the presence and absence of CB7 or  $\beta$ -CD host in aqueous phosphate buffer solution (pH 7.2) at 298.15 K. The concentration of DHC is  $1.42 \times 10^{-5} \text{ mol dm}^{-3}$ .

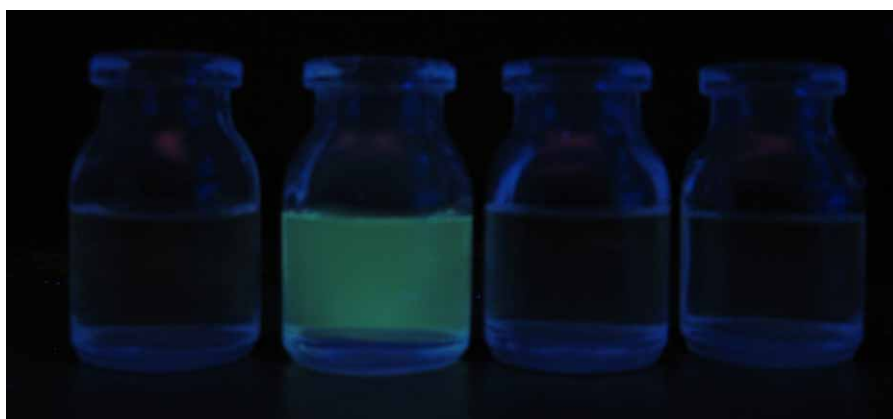

**Fig. S3** Visible emission observed from samples of P and CB7,  $\beta$ -CD and glycoluril.

Left to right: P, P + CB7, P +  $\beta$ -CD and P + glycoluril.

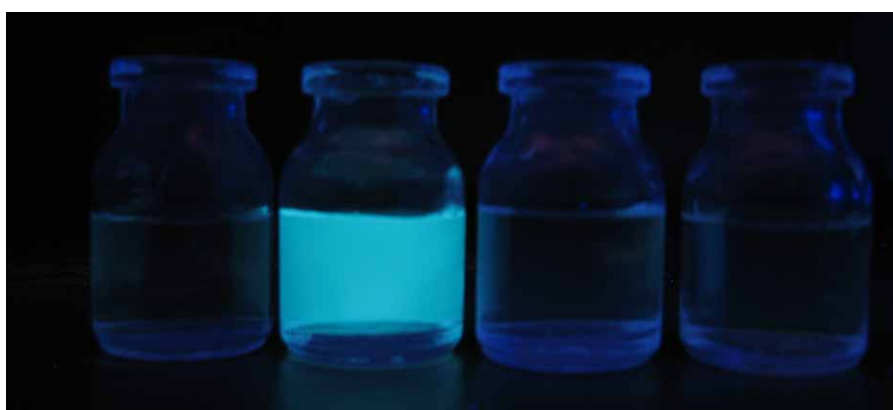

**Fig. S4** Visible emission observed from samples of DHC and CB7,  $\beta$ -CD and glycoluril. Left to right: DHC, DHC + CB7, DHC +  $\beta$ -CD and P + glycoluril.

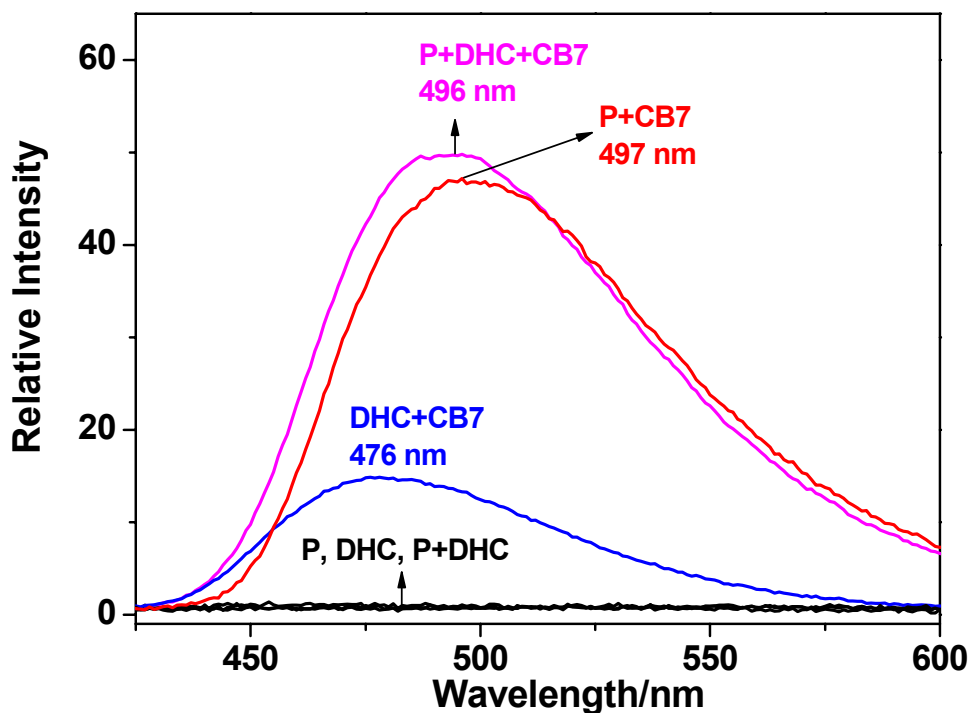

**Fig. S5** Fluorescence spectra of P( $1.86 \times 10^{-5} \text{ mol dm}^{-3}$ ), DHC( $1.81 \text{ mol dm}^{-3}$ ) and the mixture of P and DHC( $1.90 \times 10^{-5} \text{ mol dm}^{-3}$  for P and  $1.85 \times 10^{-5} \text{ mol dm}^{-3}$  for DHC) in the absence and presence of about 1 mol equivalent of CB7 in aqueous phosphate buffer solution (pH 7.2) at 298.15 K ( $\lambda_{\text{ex}} = 348 \text{ nm}$ ).

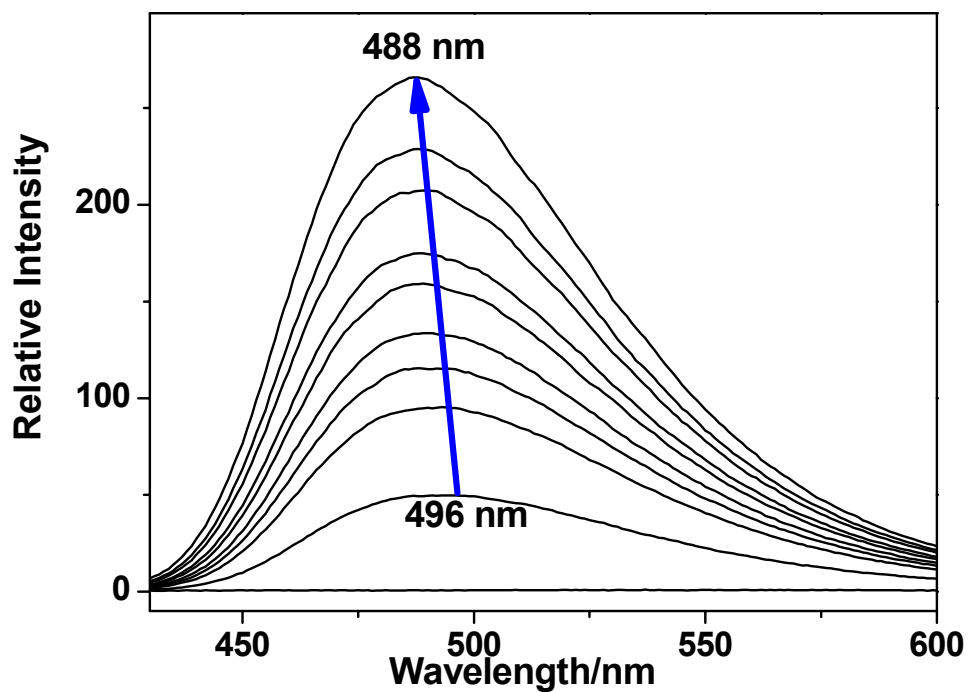

**Fig. S6** Fluorescence spectral changes of the mixture of P and DHC ( $1.90 \times 10^{-5}$  mol  $\text{dm}^{-3}$  for P and  $1.85 \times 10^{-5}$  mol  $\text{dm}^{-3}$  for DHC) with the addition of CB7 (0, 1eq, 2eq, 3eq, 4eq, 5eq, 6eq, 8eq, 11eq and 17eq) in aqueous phosphate buffer solution (pH 7.2) at 298.15 K ( $\lambda_{\text{ex}} = 348$  nm).

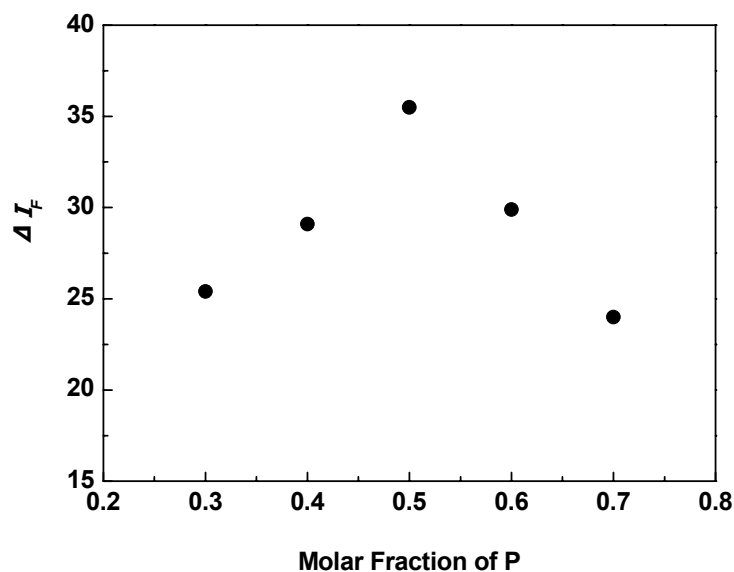

**Fig. S7** Job's plot for inclusion complexation of P with CB7 ( $[P]+[CB7]=2.65 \times 10^{-5} \text{ mol dm}^{-3}$ ) in phosphate buffer solution (pH 7.2)

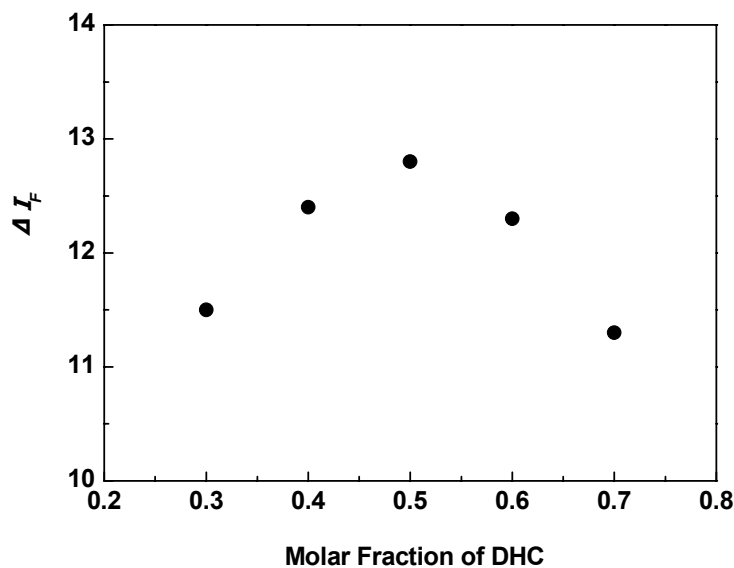

**Fig. S8** Job's plot for inclusion complexation of DHC with CB7 ( $[DHC]+[CB7]=2.92 \times 10^{-5} \text{ mol dm}^{-3}$ ) in phosphate buffer solution (pH 7.2)

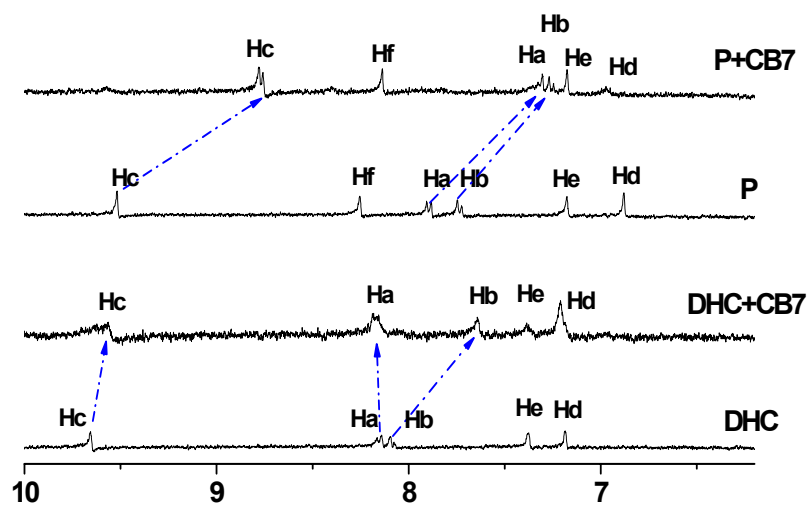

**Fig. S9** <sup>1</sup>H NMR spectra (300 MHz, 0.2 M NaCl-D<sub>2</sub>O, 298 K) of P + 1.1 equiv of CB7, P, DHC + 1.1 equiv of CB7 and DHC. The concentrations of P and DHC are 1.2 and  $1.1 \times 10^{-3}$  mol dm<sup>-3</sup>, respectively.



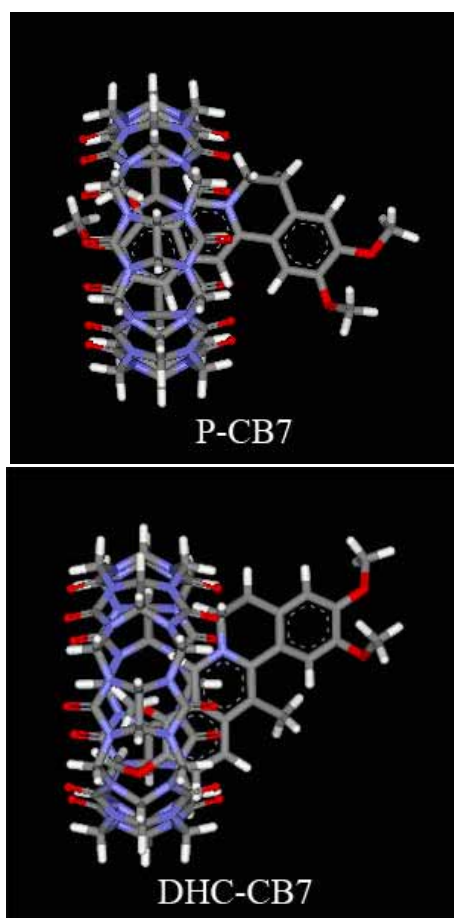

**Fig. S10** Possible structures of P-CB7 and DHC-CB7 constructed according to MD simulation.
